# Supplementary material for: Dining with liberals and conservatives: The social underpinnings of food neophobia
Source: PubMed Central journal article supplement (PMC8794126; doi:10.1371/journal.pone.0262676), 2022-01-27
Supplement: pone.0262676.s002.pdf [file pone.0262676.s002.pdf]

## S2 Appendix – Studies 3-4 restaurant menu

### 1) Antipasti

Tagliere di affettati italiani (prosciutto crudo e cotto, salame, coppa)\*  
Bruschette sicilian style (pane tostato con pomodorini e basilico)\*  
Insalata di mare (calamari, gamberetti, granchio, polpo)\*  
Uova centenarie (uova lasciate 100 giorni in acqua, sale, carbone e ossido di calcio)  
Dolmaedes (involtini di riso avvolti nelle foglie di vite)  
Souskai De Platano (insalata di platani con peperoncino, aglio ed olio)

### 2) Primi

Fettucine Alfredo (con burro e parmigiano)\*  
Spaghetti alla bolognese (con ragù di carne)\*  
Risotto alla boscaiola (con funghi misti, panna e formaggio)\*  
Manti (ravioli ripieni di agnello, conditi con yogurt all'aglio e burro al peperoncino)  
Turtle soup (zuppa di carne di tartaruga, spinaci e uova)  
Ramen (noodles con salsa di soia, verdure, funghi shiitake e sesamo nero) - replaced in Study 4 by  
Bokkeumbap (riso saltato con daikon fermentato, alghe jim, funghi shiitake e sesamo nero)

### 3) Secondi

Saltimbocca alla romana (involtini di vitello, prosciutto crudo e salvia)\*  
Baccalà alla veneziana (merluzzo mantecato con latte e cipolla)\*  
Polpette vegetariane alla parmigiana (polpette di melanzane con pomodoro e grana)\*  
Rollè di tempeh esotico (con ananas e papaya)  
Camel Burger (hamburger di cammello servito con cipolle caramellate)  
Kæstur hákarl (carne di squalo servita con panna acida, patate e cipolla)

### 4) Contorni

Insalata mista (lattuga gentile, pomodori e carote)\*  
Fantasia di asparagi (asparagi stufati al burro con formaggio filante)\*  
Contorno primavera (carote, fagiolini e piselli stufati con erba cipollina)\*  
Spiedini di topinambur e zucca con salsa di lattuga  
Pak choy (cavolo cinese saltato con zenzero e peperoncino)  
Babaganoush (caviale di melanzane con tahin, aglio e menta)

### 5) Dolci

Tiramisù (semifreddo con savoiardi, caffè e formaggio fresco)\*  
Crostata Luisa (crostata di pasta frolla con marmellata di albicocche)\*  
Torta nera della nonna (torta soffice con pere e cioccolato)\*  
Manju (dolcetti di riso e grano saraceno ripieni di crema dolce di azuki)  
Halva (dolce a base di semolino e uvetta, profumato al cardamomo)  
Mjuk rabarberkaka (torta soffice al rabarbaro con scaglie di cocco)

\*Familiar dishes.
